# Supplementary material for: Collapse of the hepatic gene regulatory network in the absence of FoxA factors
Source: PubMed Central journal article supplement — Genes Dev. 2020 Aug 1;34(15-16):1039–50. doi: 10.1101/gad.337691.120 (PMC7397852; doi:10.1101/gad.337691.120), 2020-08-01
Supplement: supp_gad.337691.120_Supplemental_Material_.pdf [file supp_gad.337691.120_Supplemental_Material_.pdf]

### Supplemental Information

**A**

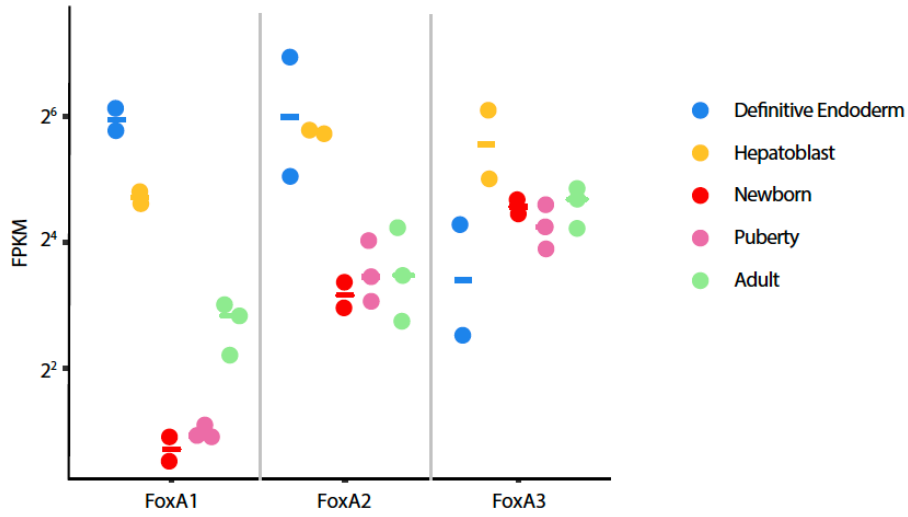

**B**

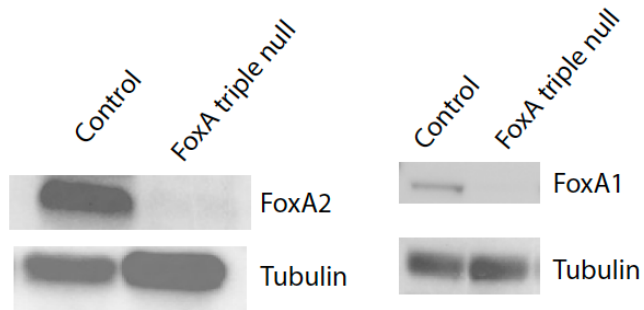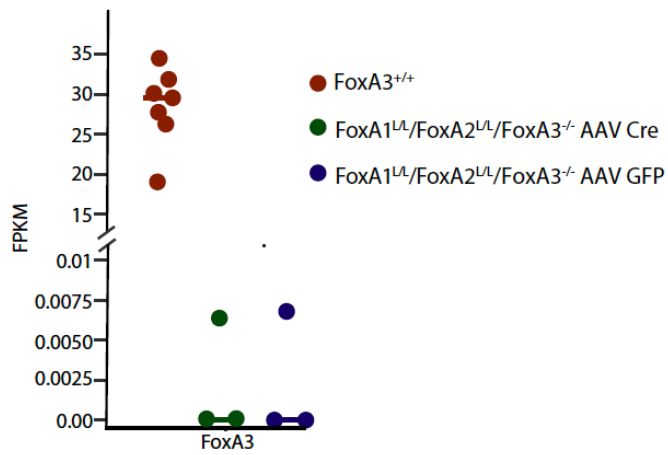

**C**

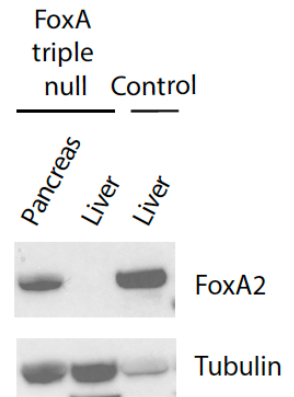

**Supplemental Figure 1. FoxA expression in development and validation of FoxA depletion.**

A. FoxA1, FoxA2 and FoxA3 expression levels at different developmental stages. FoxA1 and FoxA2 in the adult are statistically significant lower compared with hepatoblast ( $p < 0.05$ , T-test).

B. Western blots on FoxA1 and FoxA2 and mRNA expression levels of FoxA3 in the triple null compared with controls, Cre or GFP were induced under the control of the hepatocyte-specific thyroid-binding globulin (Tbg) promoter. The FoxA3 null allele used in these studies is a germline deletion of the gene as described in (Kaestner et al. 1998; Shen et al. 2001). This mutant allele replaced the entire FoxA3 coding sequence with LacZ, and thus does not express any FoxA3. C. Western blot showing no depletion of FoxA2 in the pancreas in our liver specific FoxA triple null model.

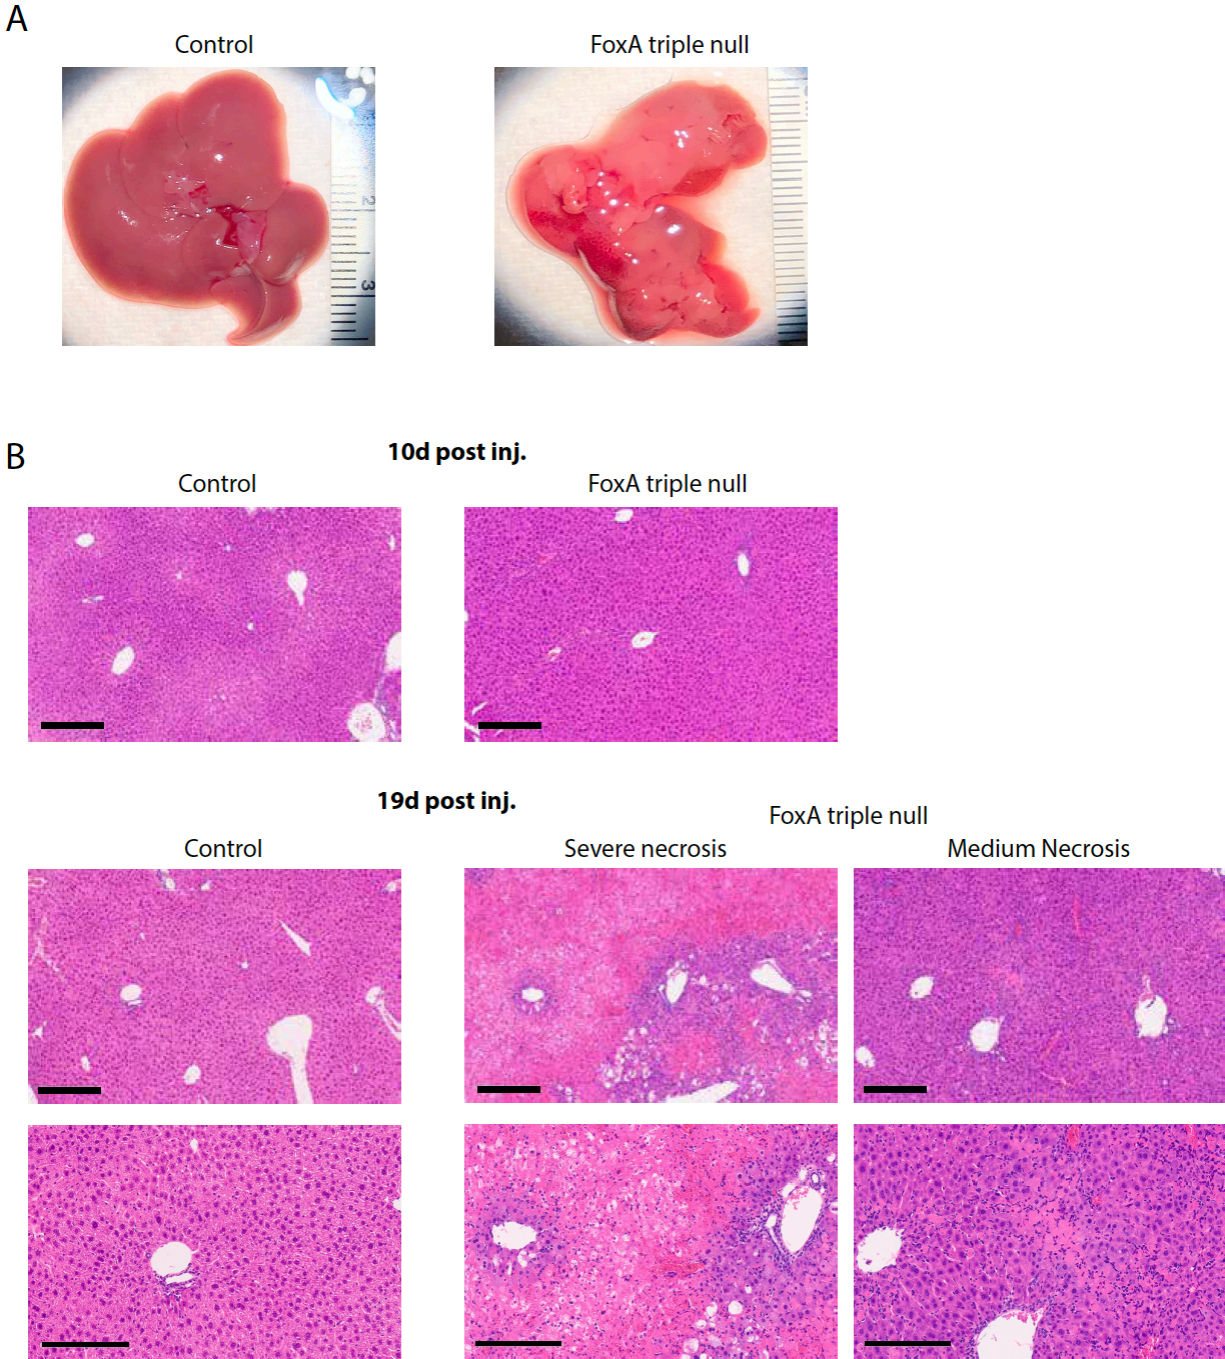

**Supplemental Figure 2. Liver phenotype of FoxA triple null.** A. Liver anatomy of FoxA triple nulls and controls. B. Hematoxylin and Eosin staining for FoxA triple nulls and controls, 10 and 19 days after Cre or GFP induction, including an example clearly showing a midzonal effect of FoxA complete depletion. Scale is 200  $\mu$ m.

**Ki67 positive hepatocytes  
10d post inj.**

Control

FoxA triple null

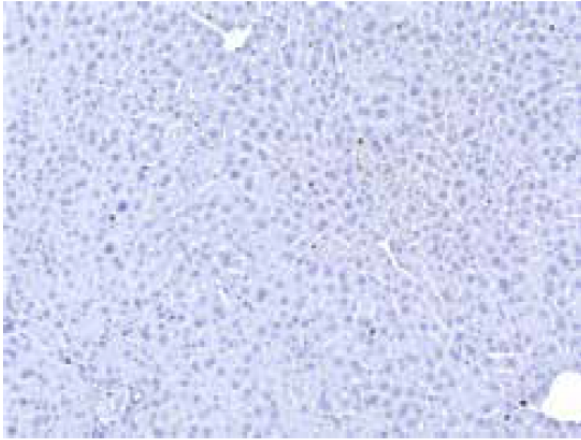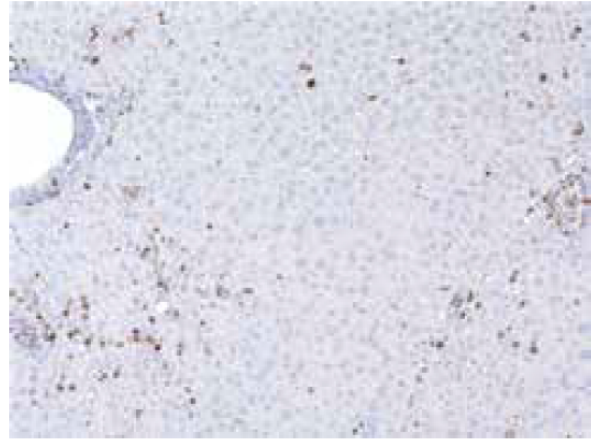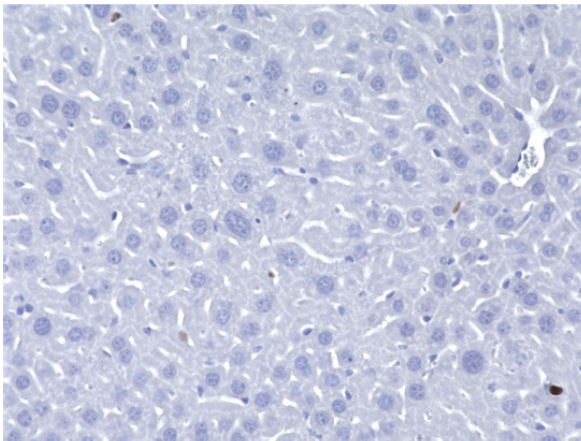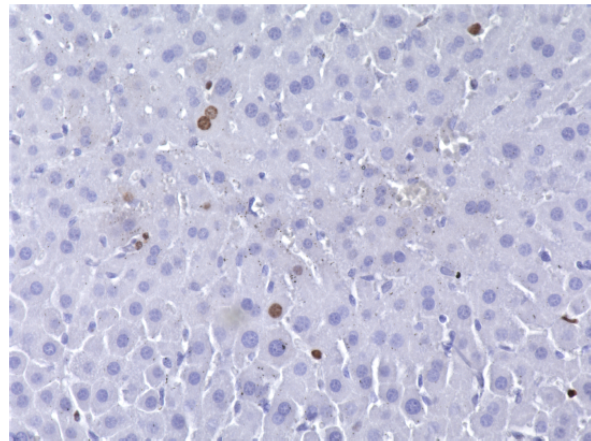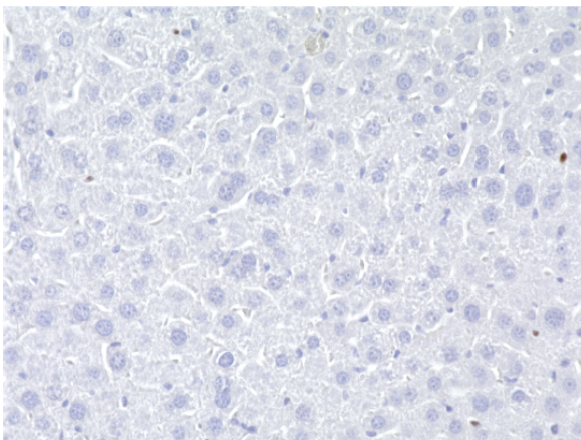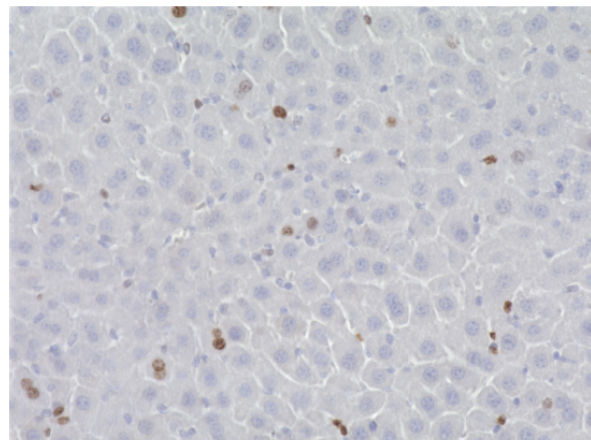

**Supplemental Figure 3. Higher proliferation rates in FoxA triple nulls.**  
Immunohistochemistry for Ki67 in FoxA triple nulls and controls, 10 days after Cre induction.

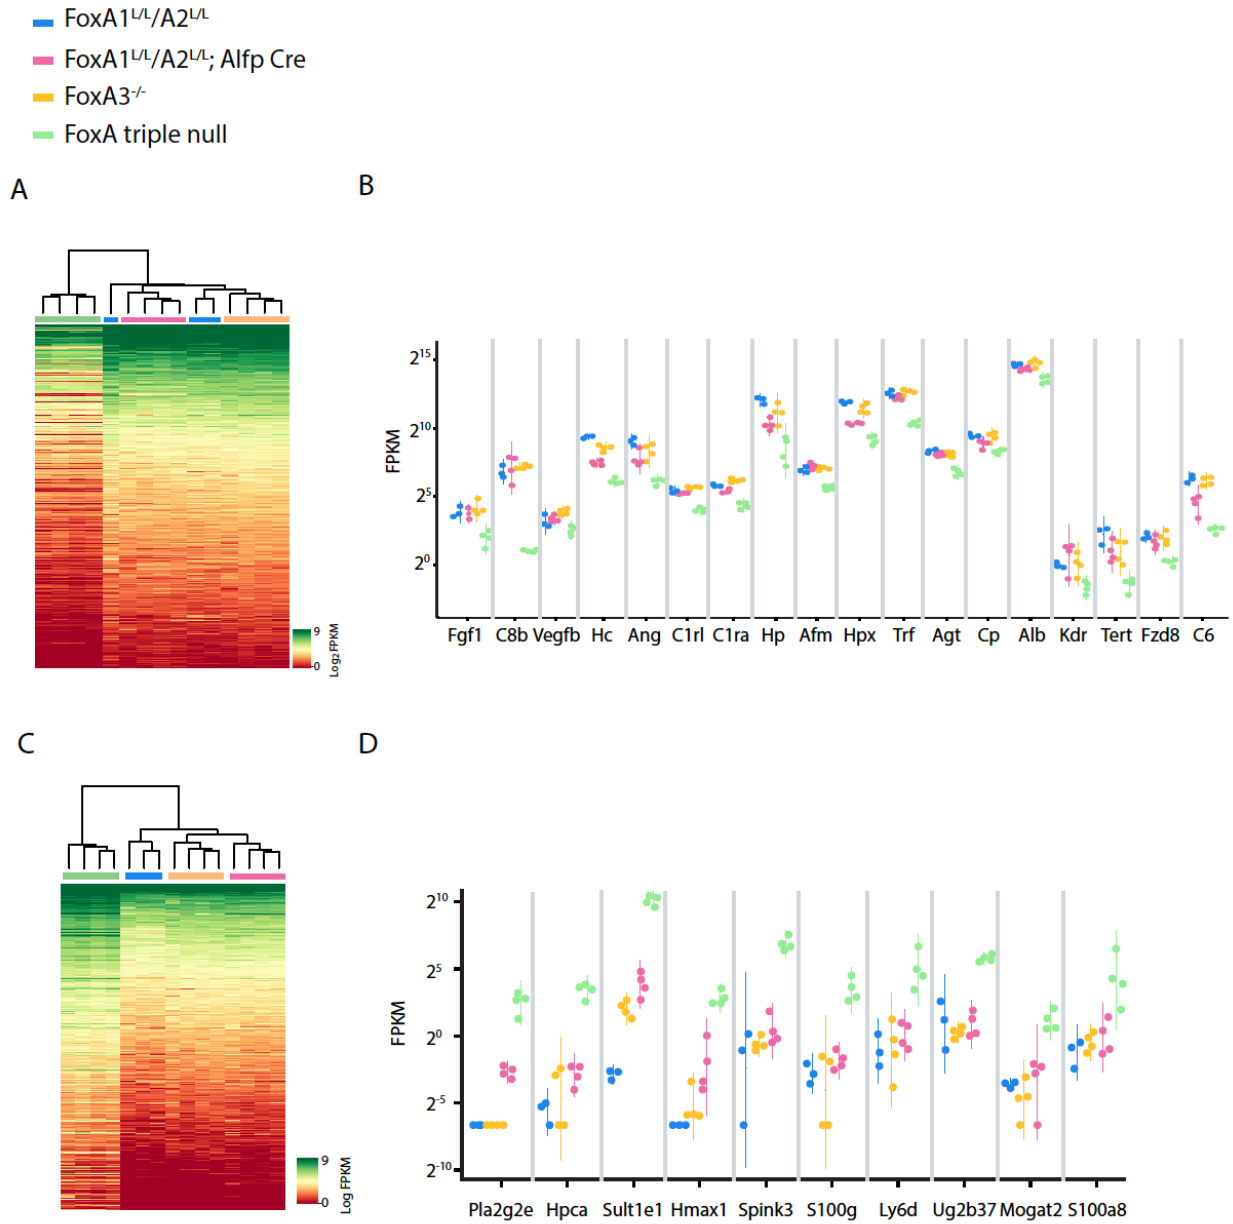

**Supplemental Figure 4. Gene expression profile of FoxA triple nulls.** A. Heatmap of 663 downregulated in FoxA triple null livers seven days after Cre induction compared to the partially FoxA depleted models indicated (adjusted  $p < 0.05$ , fold change  $> 1.5$ ). B. Gene expression levels of key liver genes downregulated in the FoxA triple nulls compared to partially depleted FoxA models (adjusted  $p$  value  $< 0.05$ , fold change  $> 1.5$ ). C. Heatmap of 513 induced genes in FoxA triple nulls compared with partially depleted FoxA models (adjusted  $p$  value  $< 0.05$ , fold change  $> 1.5$ ). D. Gene expression levels of liver genes upregulated in the FoxA triple nulls compared to partially depleted FoxA models (adjusted  $p$  value  $< 10^{-5}$ , fold change  $> 20$ ).

**A**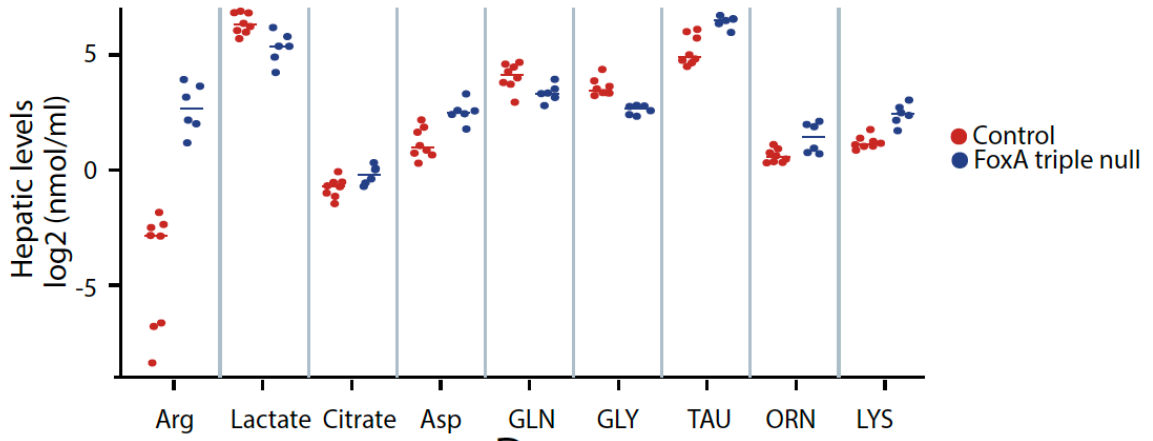**B**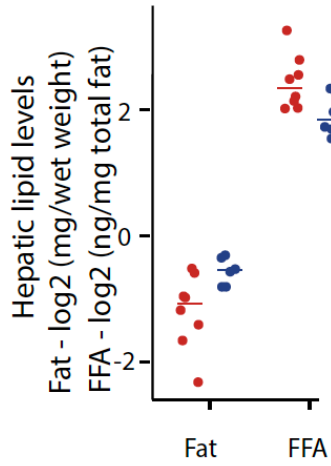**D**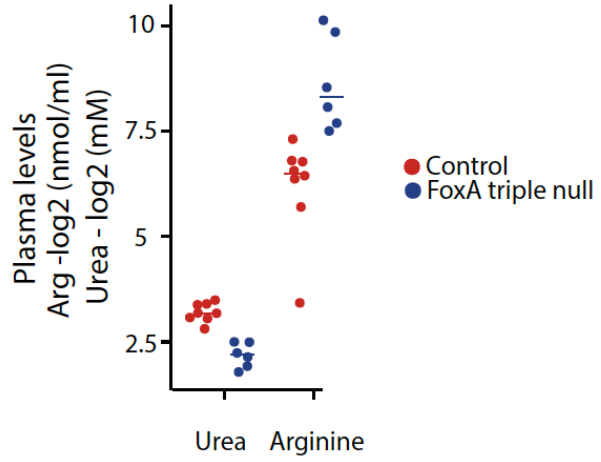**C**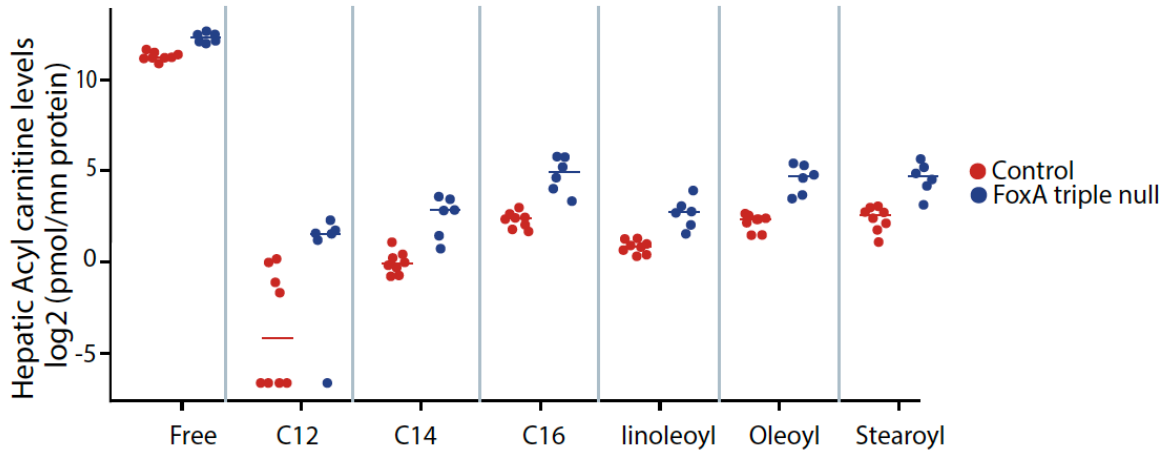

**Supplemental Figure 5. Metabolomics profiling of FoxA triple null.** FoxA triple null metabolomics profiling of hepatic amino acids, lipids, and Acyl carnitine (A-C) as well as plasma levels of Urea and Arginine (D). FoxA triple nulls levels are statistically significant different from controls for all the metabolites presented in this figure.  $p < 0.05$  Mann-Whitney-Wilcox test.

A

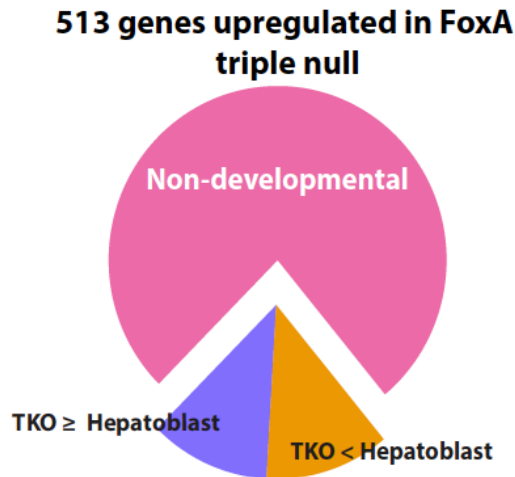

C

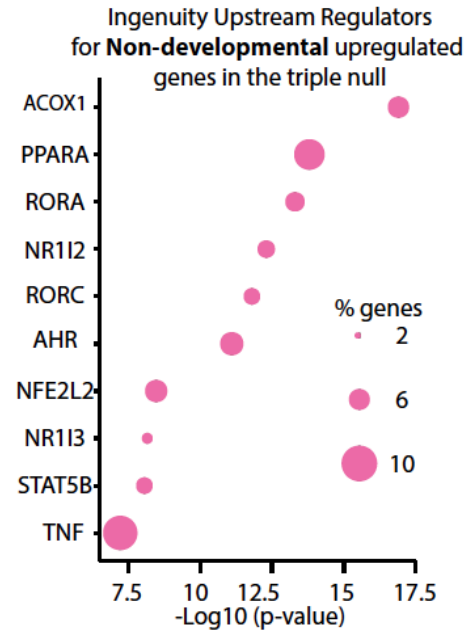

B

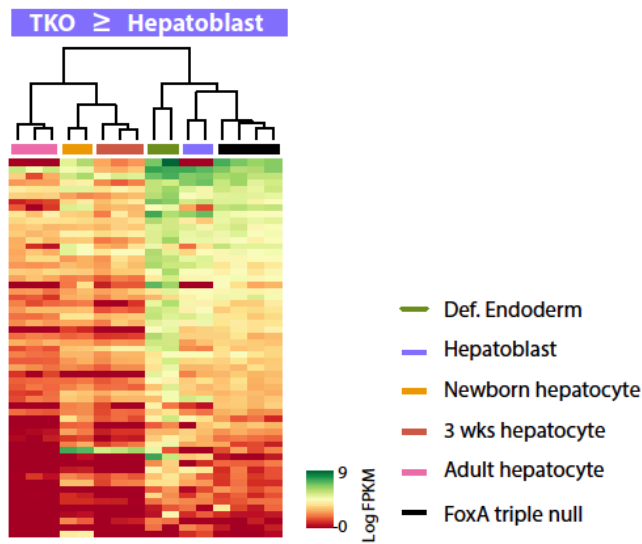

D

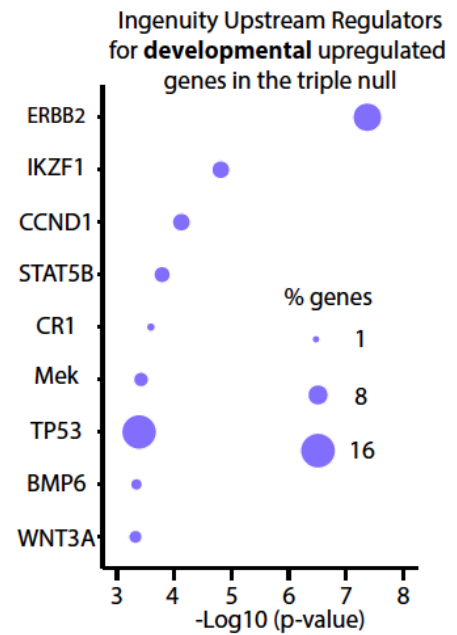

**Supplemental Figure 6. Adult ablation of FoxA factors induces an indirect upregulation of genes associated mainly with the activation of nuclear receptors.** A. Only a minority of the upregulated genes in the triple null are repressed during liver development, and an even smaller portion are reactivated in the FoxA triple nulls back to total hepatoblast levels, probably



demonstrating an indirect effect of FoxA depletion on the expression of these genes. B. Heatmap of the few upregulated genes whose expression is elevated back to prehepatic stage. C-D. Upstream regulators of developmental and non-developmental upregulated genes in the FoxA triple nulls. Non-developmental genes are mainly characterized by upstream regulators associated with nuclear receptors, and developmental genes are mainly associated with proliferation.

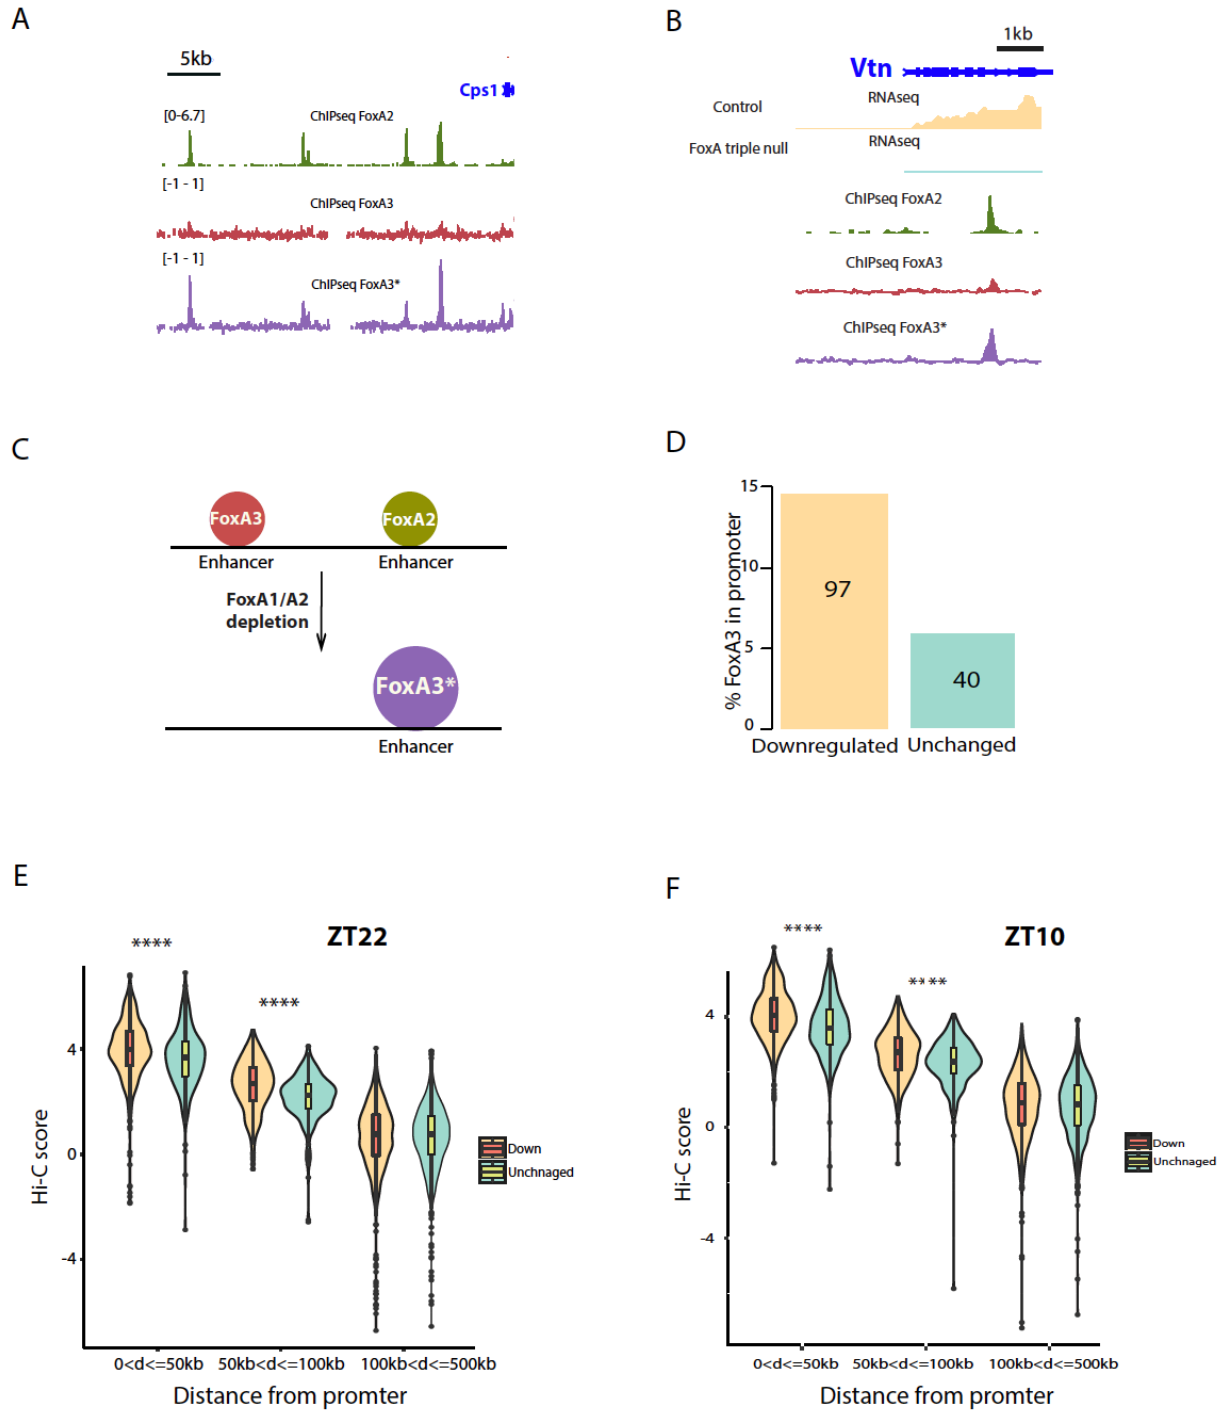

**Supplemental Figure 7. FoxA3\* binding sites are associated with down-regulated genes in FoxA triple null. A-C.** Two examples of enhancer switching of FoxA3 in FoxA1/A2 double mutants and a model showing that FoxA3 doubles its hepatic binding sites in FoxA1/A2 double

mutants. Most of these sites overlap with FoxA1/A2 binding sites. B. also serves as an example of FoxA3\* binding next to Vtn promoter which is differentially expressed. D. Percentage of FoxA3\* binding promoters in downregulated genes in FoxA triple null compared with controls and genes that are unchanged in FoxA triple null ( $p < 0.0001$ , proportional test, numbers in bars represent number of genes). E-F. Violin plots showing higher HiC contacts between FoxA3\* binding sites and promoters of downregulated genes in FoxA triple null compared with promoters of unchanged genes. (\*\*\*\* means  $p < 0.00001$  one sided Wilcoxon test, shown are two different HiC data sets). E and F represent two different circadian time points. Data in E is based on livers isolated at 5 am (ZT22), data in F is based on livers isolated at 5 pm (ZT10). The similar association between FoxA3\* binding and gene expression at these two data sets indicates the FoxA3\* binding is not affected by circadian changes.

A

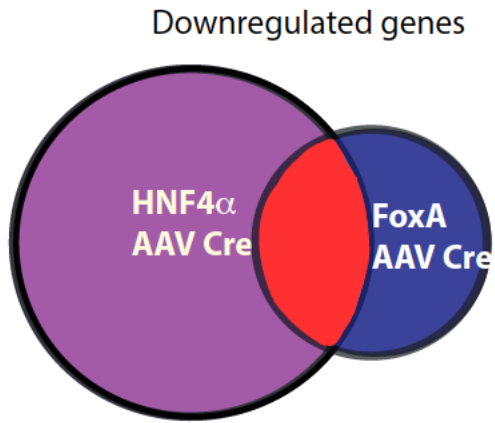

B

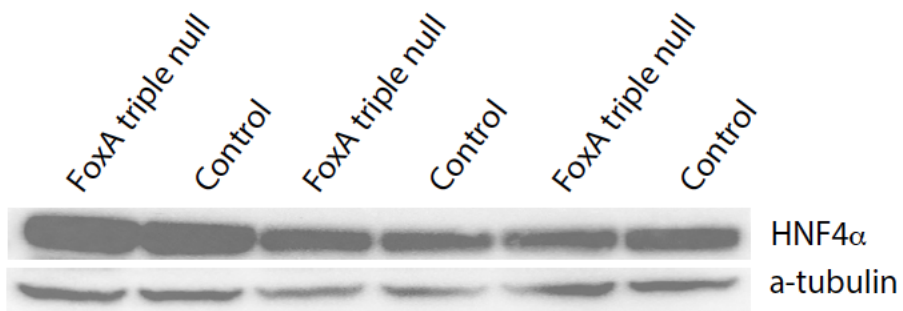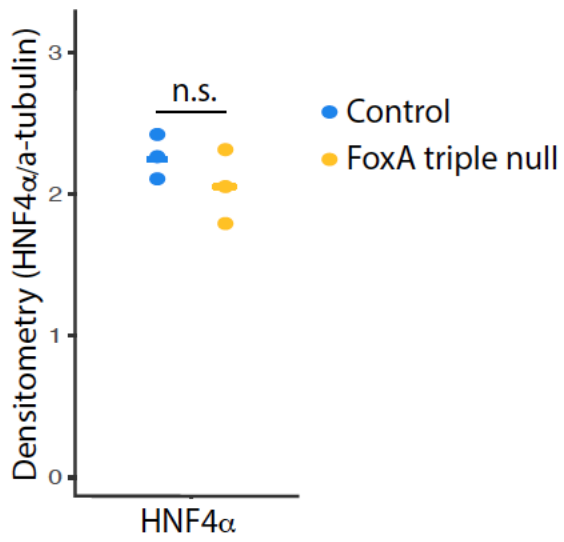

**Supplemental Figure 8. FoxA triple nulls have no effect on HNF4 $\alpha$  protein levels, and many genes are coregulated by FoxA and HNF4 $\alpha$ .** A. 37% of FoxA triple null repressed genes are also downregulated in the HNF4 $\alpha$  deficient liver. B. Western blot showing no change in HNF4 $\alpha$  protein levels in FoxA triple null and quantification of the western blot.

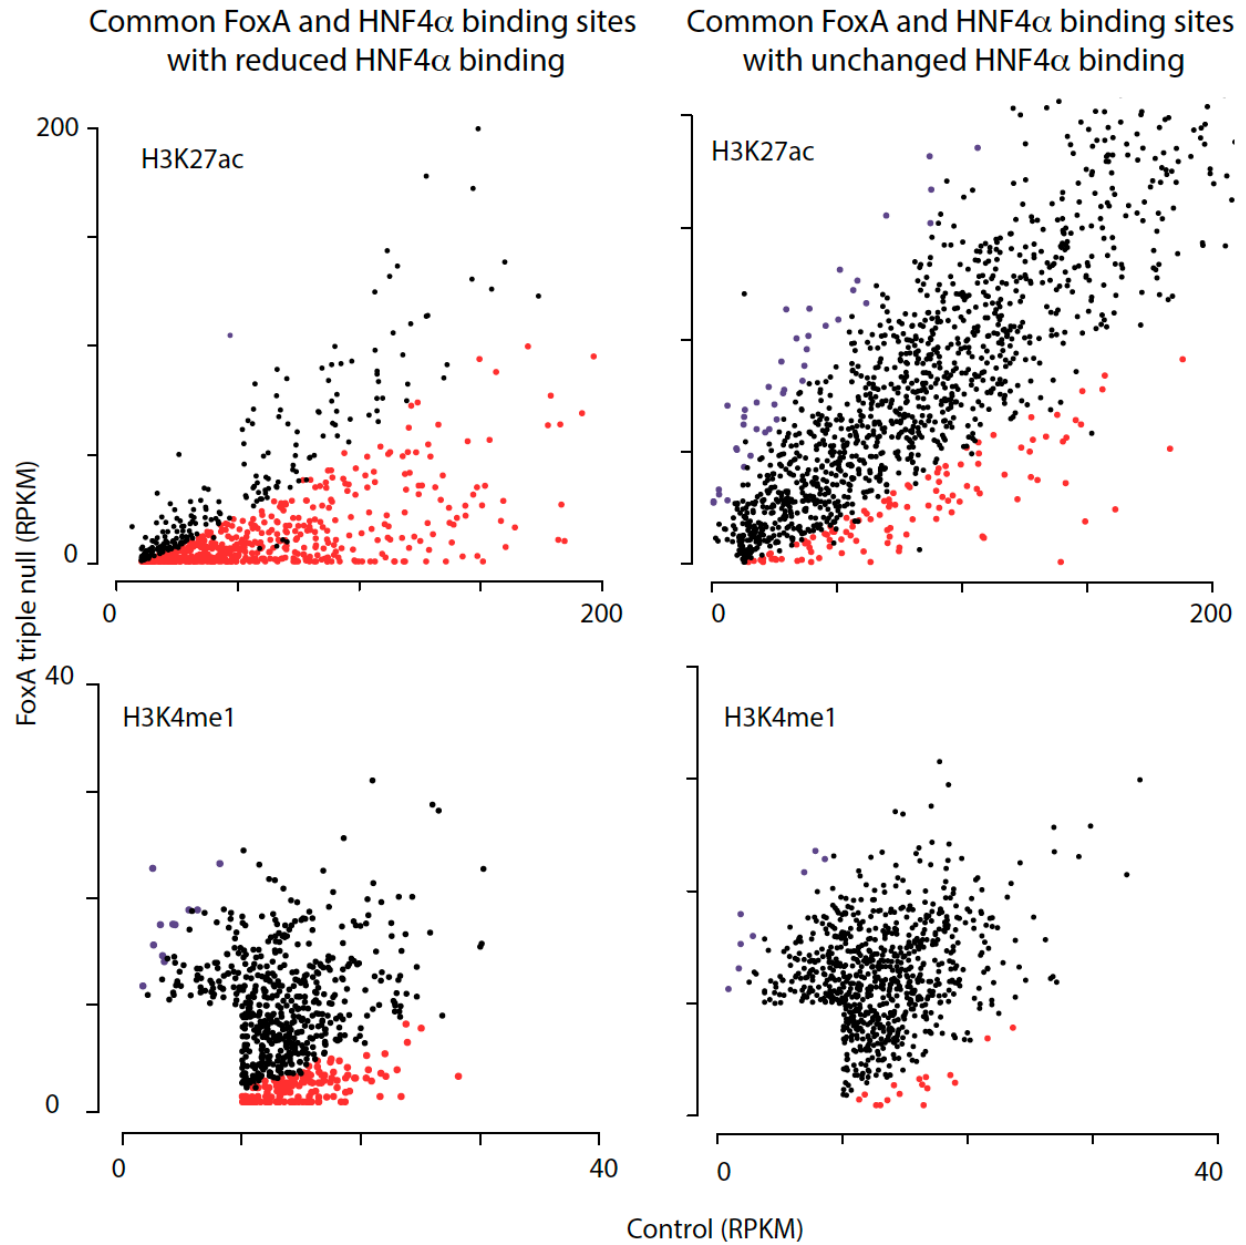

**Supplemental Figure 9. Co-bound FoxA/HNF4 $\alpha$  sites lose enhancer markers in the FoxA triple null.** Quantification of H3K27ac and H3K4me1 signal in HNF4 $\alpha$ /FoxA3\* common sites that show either no loss of HNF4 $\alpha$  occupancy or loss of HNF4 $\alpha$  binding. Increased or decreased H3K27ac or H3K4me1 is marked in purple or red, respectively. FDR < 0.05. Each group contains 2 samples.

A

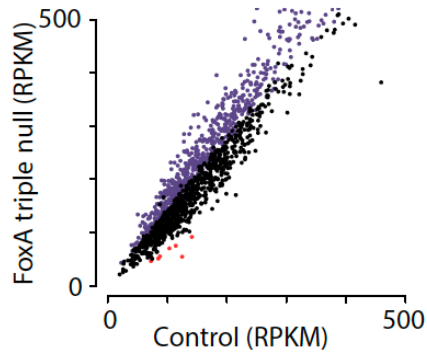

Atac-seq on common FoxA and HNF4 $\alpha$  binding sites with unchanged HNF4 $\alpha$  binding

B

Common FoxA and HNF4 $\alpha$  binding sites with reduced HNF4 $\alpha$  binding

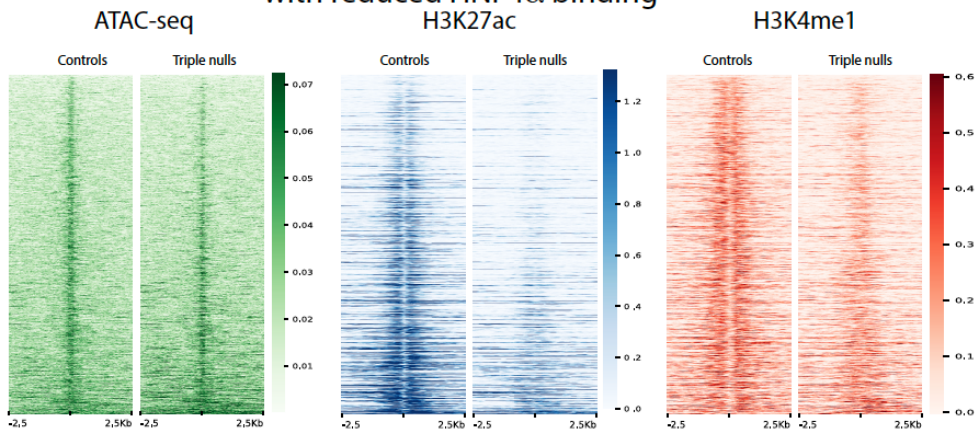

C

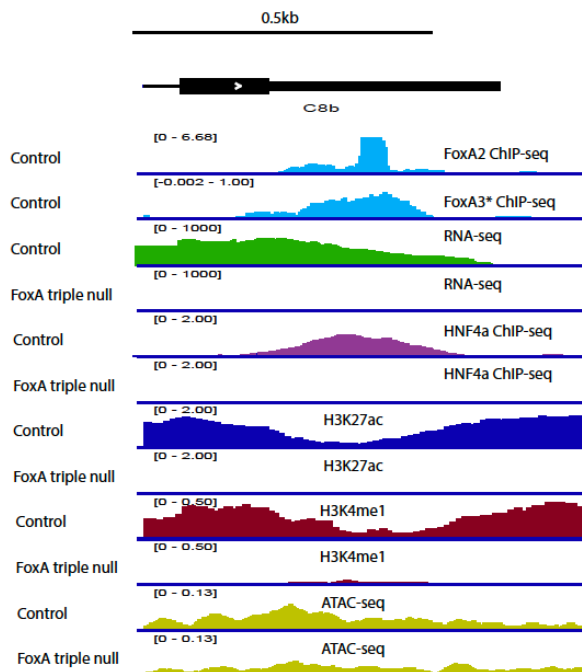

**Supplemental Figure 10. Lower accessibility at HNF4 $\alpha$ /FoxA co-bound sites with reduced HNF4 $\alpha$  binding.** A. Scatter plot of ATAC-seq RPKM values in FoxA triple null livers compared to controls in co-bound HNF4 $\alpha$ /FoxA sites that show no loss of HNF4 $\alpha$  binding. Decreased accessibility sites are indicated as red dots and increased with purple. FDR < 0.05. Each group contains 3 samples. B. Heatmap of ATAC-seq, H3K27ac and H3K4me1 signal in HNF4 $\alpha$ /FoxA common binding sites with loss of HNF4 $\alpha$  occupancy, ranked according to the ATAC difference between controls and triple nulls (n=3, for controls or mutants). C. HNF4 $\alpha$ /FoxA common site next to the S8 gene in which loss of FoxA binding results in down-regulation of gene expression, loss of HNF4 $\alpha$  binding, H3K27ac and H4K4me1 signals and reduced accessibility.



A

**Motif analysis on FoxA3\* sites with lower or unchanged accessibility in FoxA triple null**

| Lower accessibility in FoxA triple null |         |          |              | Unchanged accessibility in FoxA triple null |         |          |              |
|-----------------------------------------|---------|----------|--------------|---------------------------------------------|---------|----------|--------------|
| TF                                      | P-value | % target | % background | TF                                          | P-value | % target | % background |
| <b>FoxA3</b>                            | 1e-224  | 64.72%   | 7.3%         | <b>FoxA3</b>                                | 1e-194  | 61.49%   | 7.27%        |
| <b>HNF6</b>                             | 1e-26   | 27.77%   | 10.6%        | <b>HNF6</b>                                 | 1e-24   | 28.67%   | 11.0%        |
| <b>Cux2</b>                             | 1e-18   | 21.5%    | 8.17%        | <b>Cux2</b>                                 | 1e-16   | 22.1%    | 8.97%        |
| <b>CEBP</b>                             | 1e-11   | 24.4%    | 12.6%        | <b>RARa</b>                                 | 1e-12   | 65.86%   | 49.26%       |
| <b>HNF4a</b>                            | 1e-7    | 17.33%   | 9.34%        | <b>HNF4a</b>                                | 1e-11   | 19.69%   | 8.93%        |
| <b>RAR</b>                              | 1e-7    | 62.42%   | 50.09%       | <b>CEBP</b>                                 | 1e-10   | 24.29%   | 12.94%       |
| <b>Erra</b>                             | 1e-5    | 47.39%   | 37.58%       | <b>PPARa</b>                                | 1e-8    | 30.63%   | 19.18%       |

B

**Motif analysis on HNF4 $\alpha$ /FoxA common site with reduced HNF4 $\alpha$  binding and loss of H3K27ac mark in FoxA triple null with or without reduced accessibility**

| Reduced accessibility |         |          |              | Unchanged accessibility |         |          |              |
|-----------------------|---------|----------|--------------|-------------------------|---------|----------|--------------|
| TF                    | P-value | % target | % background | TF                      | P-value | % target | % background |
| <b>FoxA3</b>          | 1e-63   | 54.95%   | 7.23%        | <b>FoxA3</b>            | 1e-57   | 51.63%   | 7.11%        |
| <b>HNF4a</b>          | 1e-6    | 22.53%   | 9.53%        | <b>HNF4a</b>            | 1e-11   | 26.63%   | 9.28%        |
| <b>NF1</b>            | 1e-3    | 13.74%   | 6.22%        | <b>PPARa</b>            | 1e-8    | 38.59%   | 19.87%       |
| <b>CEBP</b>           | 1e-3    | 20.88%   | 12.26%       | <b>HNF6</b>             | 1e-6    | 22.28%   | 9.92%        |
| <b>Cux1</b>           | 1e-3    | 20.8%    | 12.37%       | <b>Cux2</b>             | 1e-5    | 17.93%   | 7.96%        |
| <b>Erra</b>           | 1e-3    | 49.45%   | 37.92%       | <b>RXR</b>              | 1e-5    | 33.7%    | 19.99%       |

**Supplemental Figure 11. Motif analysis in sites with reduced/unchanged accessibility suggest for additional transcription factor binding motifs that are enriched at FoxA regulated enhancers. A-B. Motif analysis using Homer on FoxA3\* sites with or without reduced accessibility in the triple nulls (A) or on common HNF4 $\alpha$ /FoxA sites that show loss of HNF4 $\alpha$**

binding and reduced H3K27ac mark with or without reduced accessibility in the triple nulls (B). Chosen are top liver-specific transcription factors motifs.

### **Supplemental references**

Kaestner KH, Hiemisch H, Schutz G. 1998. Targeted disruption of the gene encoding hepatocyte nuclear factor 3gamma results in reduced transcription of hepatocyte-specific genes. *Mol Cell Biol* **18**: 4245-4251.

Shen W, Scearce LM, Brestelli JE, Sund NJ, Kaestner KH. 2001. Foxa3 (hepatocyte nuclear factor 3gamma ) is required for the regulation of hepatic GLUT2 expression and the maintenance of glucose homeostasis during a prolonged fast. *J Biol Chem* **276**: 42812-42817.
